# Supplementary material for: Is Dry Needling Effective When Combined with Other Therapies for Myofascial Trigger Points Associated with Neck Pain Symptoms? A Systematic Review and Meta-Analysis
Source: Pain Res Manag. 2021 Feb 2;2021:8836427. doi: 10.1155/2021/8836427 (PMC7872772; doi:10.1155/2021/8836427)
Supplement: Supplementary Materials — Supplementary Table 1: database formulas during literature search; Supplementary Table 2: characteristics of the dry needling intervention of the included studies; Supplementary Table 3: adverse events described in the included studies. [file 8836427.f1.zip]

Archive with 3 entries (3 files):
- 8836427.f1/Suplementary Table 1.docx
- 8836427.f1/Suplementary Table 2.docx
- 8836427.f1/Suplementary Table 3.docx
